# Supplementary material
Source: publisher site journal article supplement (https://www.dovepress.com/article/460177)
Supplement: Supplementary file 1 [file get_supplementary_file.php]

**Swelling rate assay:** First, the wet mass of the sample was measured after transferring to deionized water for up to 10 min to adequately absorb water, and recorded as w0. Thereafter, samples were transferred to deionized water for up to 1, 5, 12, 24, 36, 48, 72 h. The wet mass was measured and recorded as wx. The swelling rate of scaffolds was calculated using Eq. S1 (*n* = 6).

**Degradation assay:** The biodegradability of scaffolds was measured for up to 21 days *in vitro*. The samples were cut into small pieces (*ca.* 15 mg) and weighed as ‘m0’ in the dry stare. Samples were added into 5 mL of EP tube containing 3 mL of PBS (pH = 7.28 ± 0.01) and incubated at 37 ℃ and 120 rpm. At pre-determined time points, samples were rinsed with the DI water three times and vacuum dried for up to a constant weight ‘mx’. The degradation of scaffolds was calculated using Eq. S2 (*n* = 3).

**Cumulative release:** The release of Si and Sr ions from PG@PSiSr (*ca.* 25 mg) was assessed after immersion in 50 mL PBS solution at 37 °C for up to 7 days. At pre-determined time point (e.g., 3, 6, 12, 24, 48, 72, 120, 192 h, etc.), the solution was collected and an equal volume of the fresh solution was added. The concentration of the released Si and Sr ions was assayed by inductively-coupled plasma-atomic emission spectroscopy (ICP-AES, Prodigy Plus, Teledyne Leeman Labs, USA).

**Western Blot Analysis:** The protein expression levels of repaired skin at day 14 were detected by western blot, including interleukin-6 (IL-6), matrix metalloproteinases-9 (MMP-9), collagen type I (Col-Ⅰ), CD31, and β-actin protein. The total protein was extracted using a BCA Protein Assay kit. The samples were transferred to polyvinylidene fluoride (PVDF) membranes and analyzed by SDS-PAGE. Membranes were incubated with primary antibody and then washing with TBST buffer. Membranes were incubated with secondary antibodies for 2 h at RT, and then visualized by ECL reagent (Merck Millipore, Shanghai, China).


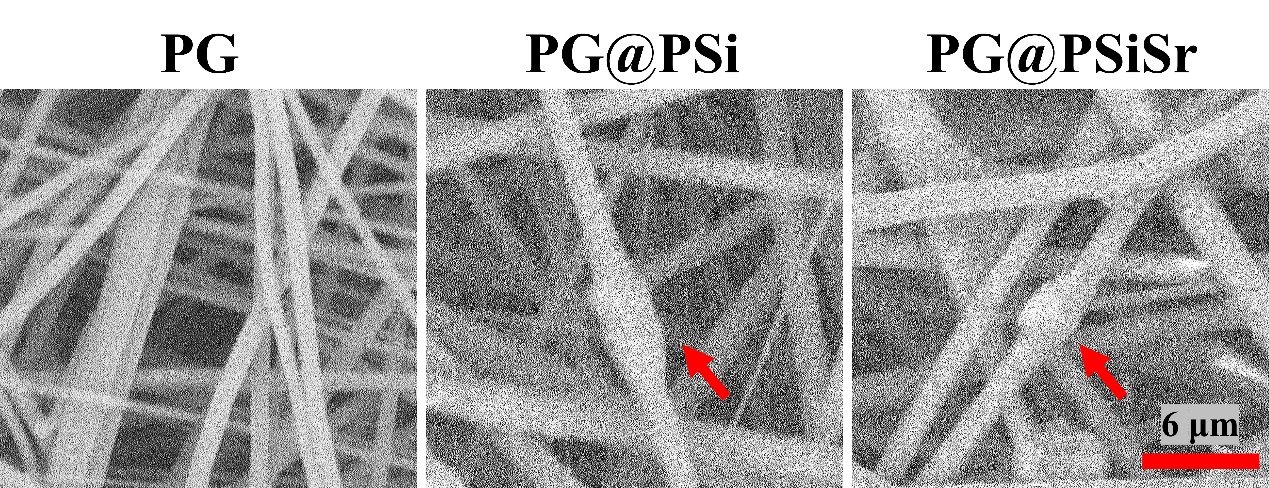


Fig. S1 The SEM of PG, PG@PSi, and PG@PSiSr scaffolds.


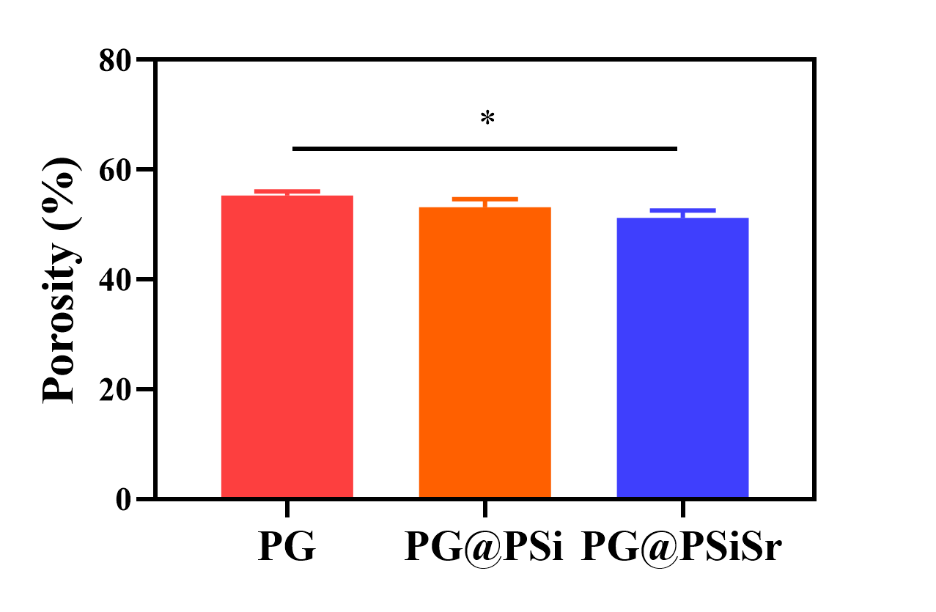


Fig. S2 The porosity of various scaffolds.


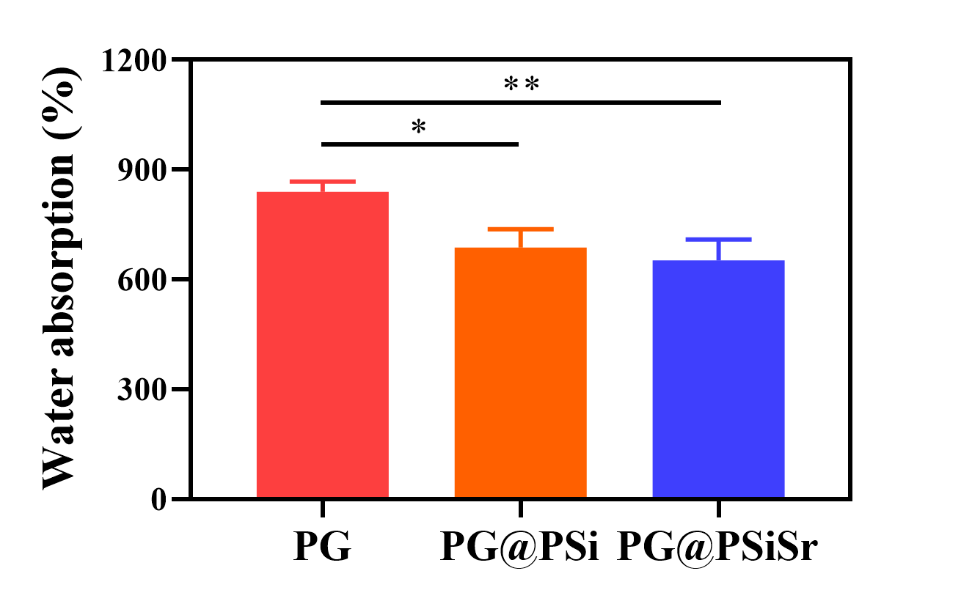


Fig. S3 The water absorption ratio of various scaffolds.


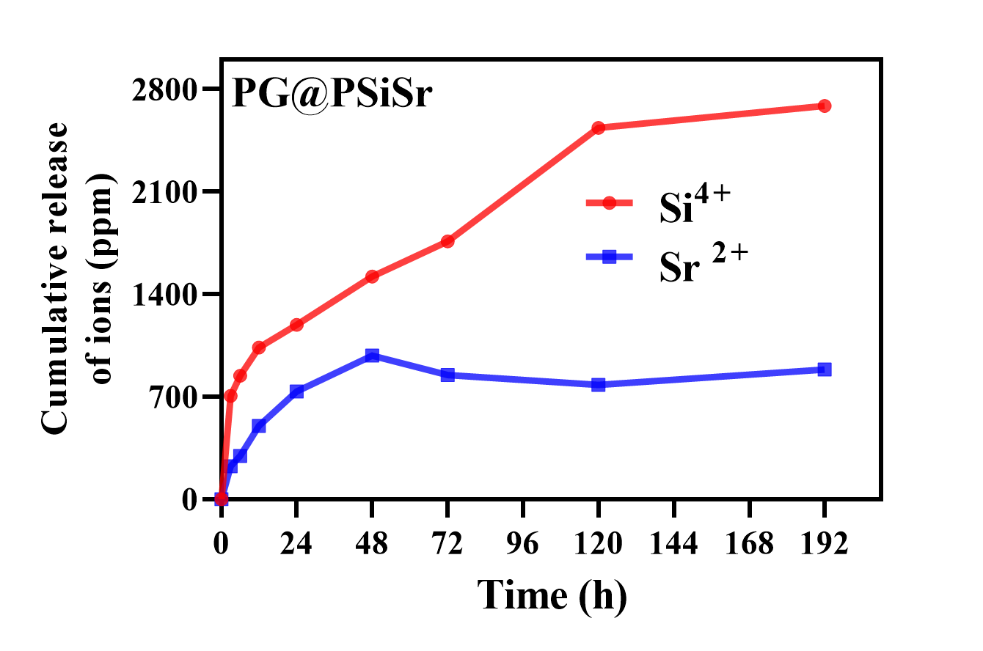


Fig. S4 Cumulative release of Si4+ and Sr2+ from PG@PSiSr.


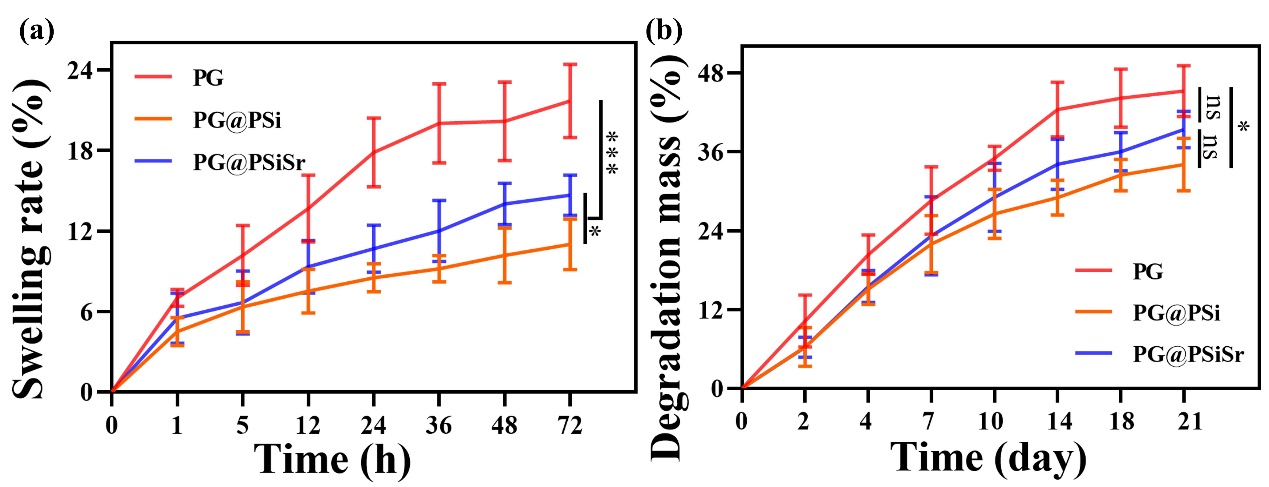


Fig. S5 The swelling rate (a) and residual weight (b) from the PG, PG@PSi, and PG@PSiSr scaffolds. The “ns” means no significant, *P < 0.05, **P < 0.01, and ***P < 0.001.


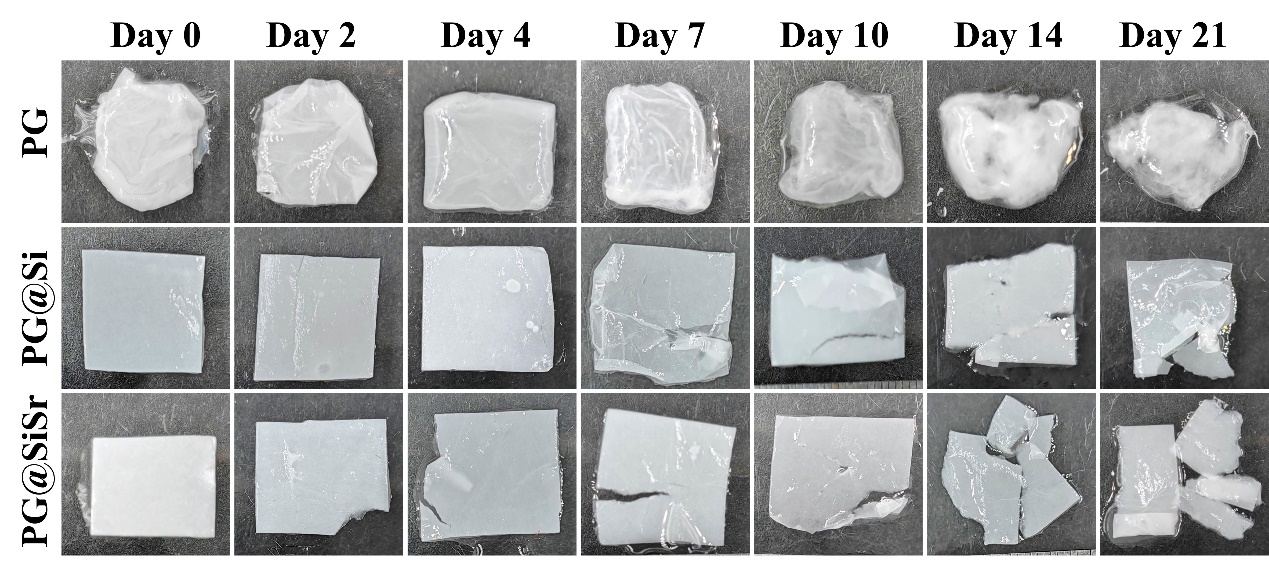


Fig. S6 The macroscopic appearance of wet PG, PG@PSi, and PG@PSiSr scaffolds after degradation for various time points.


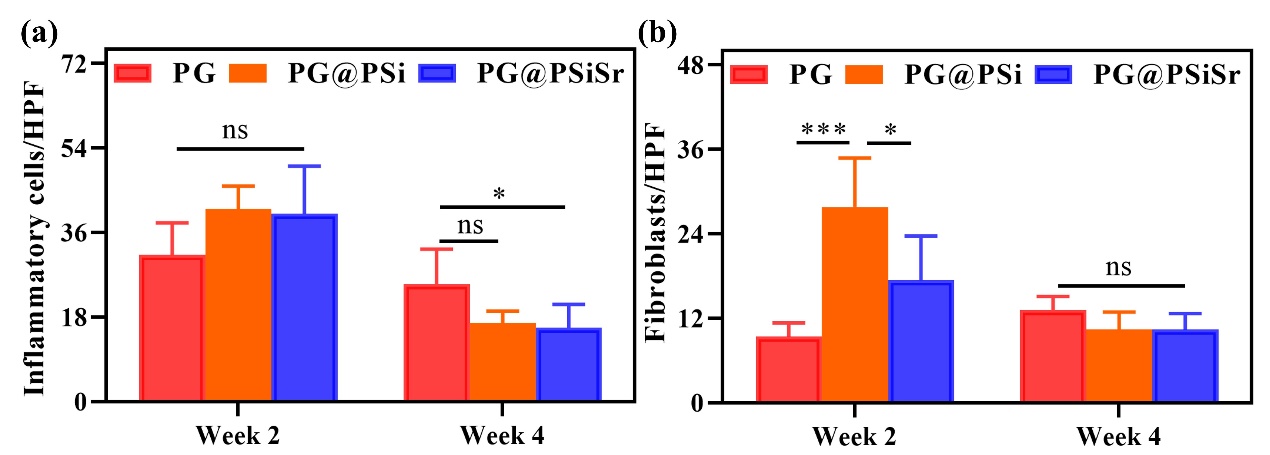


Fig. S7 The number of inflammatory cells (a) and fibroblasts (b) in a subcutaneous implantation model at 2 and 4 weeks. The “ns” means no significant, *P < 0.05, **P < 0.01, and ***P < 0.001.


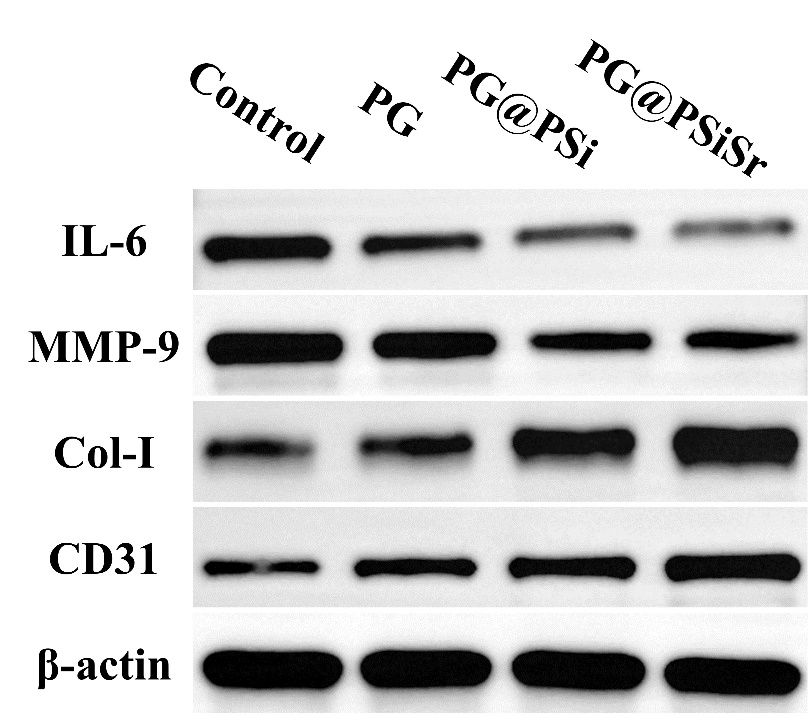


Fig. S8 Representative images of western blot analysis of IL-6, MMP-9, Col-Ⅰ, CD31, and β-actin.

**Statistical analysis**

| **Table S1:** Water absorption | | | | | | | | | | | | | | | | | | | | | |
| --- | --- | --- | --- | --- | --- | --- | --- | --- | --- | --- | --- | --- | --- | --- | --- | --- | --- | --- | --- | --- | --- |
| Name | | Mean Diff. | | | | | 95.00% CI of diff. | | | Summary | | | P Value | | | |
| PG vs. PG@PSi | | 152.7 | | | | | 35.77 to 269.6 | | | * | | | 0.0166 | | | |
| PG vs. PG@PSiSr | | 187.3 | | | | | 70.44 to 304.2 | | | ** | | | 0.0064 | | | |
| PG@PSi vs. PG@PSiSr | | 34.67 | | | | | -82.23 to 151.6 | | | ns | | | 0.6543 | | | |
| Noted: The “ns” means no significant, *P < 0.05, **P < 0.01, and ***P < 0.001.  **Table S2**: Porosity of membranes | | | | | | | | | | | | | | | | | | | | |
| Name | Mean Diff. | | | | 95.00% CI of diff. | | | | Summary | | | | | P Value | | | | |
| PG vs. PG@PSi | 2.127 | | | | -0.8595 to 5.113 | | | | ns | | | | | 0.1526 | | | | |
| PG vs. PG@PSiSr | 4.047 | | | | 1.060 to 7.033 | | | | * | | | | | 0.0141 | | | | |
| PG@PSi vs. PG@PSiSr | 1.92 | | | | -1.066 to 4.906 | | | | ns | | | | | 0.1997 | | | | |
| Noted: The “ns” means no significant, *P < 0.05, **P < 0.01, and ***P < 0.001.  **Table S3:** pHof the supernatant after degradation of the membranes | | | | | | | | | | | | | | | | | |
| Name | | | Mean Diff. | | | 95.00% CI of diff. | | | | | Summary | | | | | P Value | |
| PG vs. PG@Si | | | -0.2 | | | -0.3123 to -0.08765 | | | | | ** | | | | | 0.0038 | |
| PG vs. PG@SiSr | | | -0.3333 | | | -0.4457 to -0.2210 | | | | | *** | | | | | 0.0002 | |
| PG@Si vs. PG@SiSr | | | -0.1333 | | | -0.2457 to -0.02099 | | | | | * | | | | | 0.0252 | |
| Noted: The “ns” means no significant, *P < 0.05, **P < 0.01, and ***P < 0.001.  **Table S4**: Hemolysis rate of the scaffolds | | | | | | | | | | | | | | | | | | | |
| Tukey's multiple comparisons test | | | | Mean Diff. | | | | 95.00% CI of diff. | | | | Summary | | | Adjusted P Value | | | | |
| P-control vs. N-Control | | | | 100 | | | | 99.14 to 100.9 | | | | **** | | | <0.0001 | | | | |
| P-control vs. PG | | | | 99.41 | | | | 98.55 to 100.3 | | | | **** | | | <0.0001 | | | | |
| P-control vs. PG@PSi | | | | 98.8 | | | | 97.94 to 99.67 | | | | **** | | | <0.0001 | | | | |
| P-control vs. PG@PSiSr | | | | 98.79 | | | | 97.93 to 99.65 | | | | **** | | | <0.0001 | | | | |
| N-Control vs. PG | | | | -0.5863 | | | | -1.448 to 0.2750 | | | | ns | | | 0.2954 | | | | |
| N-Control vs. PG@Psi | | | | -1.196 | | | | -2.057 to -0.3343 | | | | ** | | | 0.0034 | | | | |
| N-Control vs. PG@PsiSr | | | | -1.208 | | | | -2.070 to -0.3471 | | | | ** | | | 0.0031 | | | | |
| PG vs. PG@PSi | | | | -0.6093 | | | | -1.471 to 0.2520 | | | | ns | | | 0.2607 | | | | |
| PG vs. PG@PSiSr | | | | -0.6221 | | | | -1.483 to 0.2392 | | | | ns | | | 0.2427 | | | | |
| PG@PSi vs. PG@PsiSr | | | | -0.0128 | | | | -0.8741 to 0.8485 | | | | ns | | | >0.9999 | | | | |

Noted: The “ns” means no significant, *P < 0.05, **P < 0.01, and ***P < 0.001.

| **Table S5**: OD value of NIH-3T3 fibroblasts at day 1 | | | | |
| --- | --- | --- | --- | --- |
| Tukey's multiple comparisons test | Mean Diff. | 95.00% CI of diff. | Summary | Adjusted P Value |
| Control vs. PG | -0.04174 | -0.09820 to 0.01472 | Ns | 0.1904 |
| Control vs. PG@PSi | -0.06996 | -0.1264 to -0.01350 | * | 0.0129 |
| Control vs. PG@PSiSr | -0.07916 | -0.1356 to -0.02270 | ** | 0.005 |
| PG vs. PG@PSi | -0.02822 | -0.08468 to 0.02824 | Ns | 0.4999 |
| PG vs. PG@PSiSr | -0.03742 | -0.09388 to 0.01904 | Ns | 0.2684 |
| PG@PSi vs. PG@PsiSr | -0.0092 | -0.06566 to 0.04726 | Ns | 0.9654 |

Noted: The “ns” means no significant, *P < 0.05, **P < 0.01, and ***P < 0.001.

| **Table S6:** OD value for NIH-3T3 fibroblasts at day 3 | | | | |
| --- | --- | --- | --- | --- |
| Tukey's multiple comparisons test | Mean Diff. | 95.00% CI of diff. | Summary | Adjusted P Value |
| Control vs. PG | -0.06874 | -0.1075 to -0.03000 | *** | 0.0006 |
| Control vs. PG@PSi | -0.11 | -0.1487 to -0.07124 | **** | <0.0001 |
| Control vs. PG@PSiSr | -0.1205 | -0.1593 to -0.08178 | **** | <0.0001 |
| PG vs. PG@PSi | -0.04124 | -0.07998 to -0.002502 | * | 0.0349 |
| PG vs. PG@PSiSr | -0.05178 | -0.09052 to -0.01304 | ** | 0.0073 |
| PG@PSi vs. PG@PsiSr | -0.01054 | -0.04928 to 0.02820 | ns | 0.8631 |

Noted: The “ns” means no significant, *P < 0.05, **P < 0.01, and ***P < 0.001.

| **Table S7:** OD value for NIH-3T3 fibroblasts at day 5 | | | | |
| --- | --- | --- | --- | --- |
| Tukey's multiple comparisons test | Mean Diff. | 95.00% CI of diff. | Summary | Adjusted P Value |
| Control vs. PG | -0.08008 | -0.2248 to 0.06460 | ns | 0.4149 |
| Control vs. PG@PSi | -0.09352 | -0.2382 to 0.05116 | ns | 0.2877 |
| Control vs. PG@PSiSr | -0.1477 | -0.2924 to -0.003018 | * | 0.0446 |
| PG vs. PG@PSi | -0.01344 | -0.1581 to 0.1312 | ns | 0.9932 |
| PG vs. PG@PSiSr | -0.06762 | -0.2123 to 0.07706 | ns | 0.554 |
| PG@PSi vs. PG@PSiSr | -0.05418 | -0.1989 to 0.09050 | ns | 0.7112 |

Noted: The “ns” means no significant, *P < 0.05, **P < 0.01, and ***P < 0.001.

| **Table S8:** OD value for HUVECs at day 1 | | | | |
| --- | --- | --- | --- | --- |
| Tukey's multiple comparisons test | Mean Diff. | 95.00% CI of diff. | Summary | Adjusted P Value |
| Control vs. PG | -0.01653 | -0.02996 to -0.003094 | * | 0.0151 |
| Control vs. PG@PSi | -0.00975 | -0.02318 to 0.003681 | ns | 0.1911 |
| Control vs. PG@PSiSr | -0.000225 | -0.01366 to 0.01321 | ns | >0.9999 |
| PG vs. PG@PSi | 0.006775 | -0.006656 to 0.02021 | ns | 0.4685 |
| PG vs. PG@PSiSr | 0.0163 | 0.002869 to 0.02973 | * | 0.0165 |
| PG@PSi vs. PG@PSiSr | 0.009525 | -0.003906 to 0.02296 | ns | 0.2061 |

Noted: The “ns” means no significant, *P < 0.05, **P < 0.01, and ***P < 0.001.

| **Table S9:** OD value for HUVECs at day 3 | | | | |
| --- | --- | --- | --- | --- |
| Tukey's multiple comparisons test | Mean Diff. | 95.00% CI of diff. | Summary | Adjusted P Value |
| Control vs. PG | -0.02023 | -0.1046 to 0.06419 | ns | 0.8907 |
| Control vs. PG@PSi | -0.0439 | -0.1283 to 0.04052 | ns | 0.4437 |
| Control vs. PG@PSiSr | -0.04283 | -0.1272 to 0.04159 | ns | 0.4639 |
| PG vs. PG@PSi | -0.02368 | -0.1081 to 0.06074 | ns | 0.8381 |
| PG vs. PG@PSiSr | -0.0226 | -0.1070 to 0.06182 | ns | 0.8555 |
| PG@PSi vs. PG@PSiSr | 0.001075 | -0.08334 to 0.08549 | ns | >0.9999 |

Noted: The “ns” means no significant, *P < 0.05, **P < 0.01, and ***P < 0.001.

| **Table S10:** OD value for HUVECs at day 5 | | | | |
| --- | --- | --- | --- | --- |
| Tukey's multiple comparisons test | Mean Diff. | 95.00% CI of diff. | Summary | Adjusted P Value |
| Control vs. PG | -0.05365 | -0.1687 to 0.06144 | ns | 0.5317 |
| Control vs. PG@PSi | -0.076 | -0.1911 to 0.03909 | ns | 0.2554 |
| Control vs. PG@PSiSr | -0.0864 | -0.2015 to 0.02869 | ns | 0.1706 |
| PG vs. PG@PSi | -0.02235 | -0.1374 to 0.09274 | ns | 0.9372 |
| PG vs. PG@PSiSr | -0.03275 | -0.1478 to 0.08234 | ns | 0.8323 |
| PG@PSi vs. PG@PSiSr | -0.0104 | -0.1255 to 0.1047 | ns | 0.9929 |

Noted: The “ns” means no significant, *P < 0.05, **P < 0.01, and ***P < 0.001.

| **Table S11:** Transwell assay for HUVECs | | | | |
| --- | --- | --- | --- | --- |
| Tukey's multiple comparisons test | Mean Diff. | 95.00% CI of diff. | Summary | P Value |
| Control vs. PG | -19.67 | -40.45 to 1.114 | ns | 0.0637 |
| Control vs. PG@PSi | -28.33 | -49.11 to -7.552 | * | 0.0103 |
| Control vs. PG@PSiSr | -48.33 | -69.11 to -27.55 | *** | 0.0003 |
| PG vs. PG@PSi | -8.667 | -29.45 to 12.11 | ns | 0.5681 |
| PG vs. PG@PSiSr | -28.67 | -49.45 to -7.886 | ** | 0.0096 |
| PG@PSi vs. PG@PsiSr | -20 | -40.78 to 0.7810 | ns | 0.0592 |

Noted: The “ns” means no significant, *P < 0.05, **P < 0.01, and ***P < 0.001.

| **Table S12:** Transwell assay for NIH-3T3 fibroblasts | | | | |
| --- | --- | --- | --- | --- |
| Tukey's multiple comparisons test | Mean Diff. | 95.00% CI of diff. | Summary | P Value |
| Control vs. PG | -14 | -22.41 to -5.595 | ** | 0.0031 |
| Control vs. PG@PSi | -44 | -52.41 to -35.59 | **** | <0.0001 |
| Control vs. PG@PSiSr | -48 | -56.41 to -39.59 | **** | <0.0001 |
| PG vs. PG@PSi | -30 | -38.41 to -21.59 | **** | <0.0001 |
| PG vs. PG@PSiSr | -34 | -42.41 to -25.59 | **** | <0.0001 |
| PG@PSi vs. PG@PsiSr | -4 | -12.41 to 4.405 | ns | 0.4678 |

Noted: The “ns” means no significant, *P < 0.05, **P < 0.01, and ***P < 0.001.

| **Table S13:** Tube-formation assay for HUVECs | | | | |
| --- | --- | --- | --- | --- |
| Tukey's multiple comparisons test | Mean Diff. | 95.00% CI of diff. | Summary | P Value |
| Control vs. PG | -13.33 | -27.67 to 1.008 | ns | 0.0687 |
| Control vs. PG@Si | -27 | -41.34 to -12.66 | ** | 0.0014 |
| Control vs. PG@SiSr | -37 | -51.34 to -22.66 | *** | 0.0002 |
| PG vs. PG@Si | -13.67 | -28.01 to 0.6746 | ns | 0.0618 |
| PG vs. PG@SiSr | -23.67 | -38.01 to -9.325 | ** | 0.0033 |
| PG@Si vs. PG@SiSr | -10 | -24.34 to 4.341 | ns | 0.194 |

Noted: The “ns” means no significant, *P < 0.05, **P < 0.01, and ***P < 0.001.

| **Table S14:** Migration assay for NIH-3T3 fibroblasts | | | | |
| --- | --- | --- | --- | --- |
| Tukey's multiple comparisons test | Mean Diff. | 95.00% CI of diff. | Summary | P Value |
| Control vs. PG | -4.833 | -15.26 to 5.590 | ns | 0.4879 |
| Control vs. PG@PSi | -31.94 | -42.36 to -21.52 | **** | <0.0001 |
| Control vs. PG@PSiSr | -41.75 | -52.17 to -31.33 | **** | <0.0001 |
| PG vs. PG@PSi | -27.11 | -37.53 to -16.68 | *** | 0.0002 |
| PG vs. PG@PSiSr | -36.92 | -47.34 to -26.49 | **** | <0.0001 |
| PG@PSi vs. PG@PsiSr | -9.81 | -20.23 to 0.6135 | ns | 0.0652 |

Noted: The “ns” means no significant, *P < 0.05, **P < 0.01, and ***P < 0.001.

| **Table S15:** Migration assay for HUVECs | | | | |
| --- | --- | --- | --- | --- |
| Tukey's multiple comparisons test | Mean Diff. | 95.00% CI of diff. | Summary | P Value |
| Control vs. PG | -5.653 | -22.97 to 11.66 | ns | 0.7294 |
| Control vs. PG@PSi | -42.07 | -59.39 to -24.75 | *** | 0.0002 |
| Control vs. PG@PSiSr | -48.99 | -66.31 to -31.67 | **** | <0.0001 |
| PG vs. PG@PSi | -36.42 | -53.73 to -19.10 | *** | 0.0007 |
| PG vs. PG@PSiSr | -43.34 | -60.65 to -26.02 | *** | 0.0002 |
| PG@PSi vs. PG@PsiSr | -6.92 | -24.24 to 10.40 | ns | 0.5991 |

Noted: The “ns” means no significant, *P < 0.05, **P < 0.01, and ***P < 0.001.

| **Table S16:** Thickness of Granulation tissues | | | | |
| --- | --- | --- | --- | --- |
| Tukey's multiple comparisons test | Mean Diff. | 95.00% CI of diff. | Summary | P Value |
| Control vs. P-control | -0.006333 | -0.07870 to 0.06603 | ns | 0.9982 |
| Control vs. PG | -0.01567 | -0.08803 to 0.05670 | ns | 0.9489 |
| Control vs. PG@PSi | -0.03433 | -0.1067 to 0.03803 | ns | 0.5502 |
| Control vs. PG@PSiSr | -0.067 | -0.1394 to 0.005367 | ns | 0.073 |
| P-control vs. PG | -0.009333 | -0.08170 to 0.06303 | ns | 0.9921 |
| P-control vs. PG@PSi | -0.028 | -0.1004 to 0.04437 | ns | 0.712 |
| P-control vs. PG@PSiSr | -0.06067 | -0.1330 to 0.01170 | ns | 0.1133 |
| PG vs. PG@PSi | -0.01867 | -0.09103 to 0.05370 | ns | 0.9089 |
| PG vs. PG@PSiSr | -0.05133 | -0.1237 to 0.02103 | ns | 0.2111 |
| PG@PSi vs. PG@PSiSr | -0.03267 | -0.1050 to 0.03970 | ns | 0.5927 |

Noted: The “ns” means no significant, *P < 0.05, **P < 0.01, and ***P < 0.001.

| **Table S17:** Wound healing at day 14 | | | | | | | | |
| --- | --- | --- | --- | --- | --- | --- | --- | --- |
| Tukey's multiple comparisons test | | Mean Diff. | | 95.00% CI of diff. | | Summary | | P Value |
| Control vs. P-control | | -7.87 | | -20.66 to 4.917 | | ns | | 0.3209 |
| Control vs. PG | | -15.89 | | -28.68 to -3.103 | | * | | 0.0146 |
| Control vs. PG@PSi | | -20.55 | | -33.33 to -7.760 | | ** | | 0.0025 |
| Control vs. PG@PSiSr | | -24.41 | | -37.19 to -11.62 | | *** | | 0.0007 |
| P-control vs. PG | | -8.02 | | -20.81 to 4.767 | | ns | | 0.3052 |
| P-control vs. PG@PSi | | -12.68 | | -25.46 to 0.1104 | | ns | | 0.0523 |
| P-control vs. PG@PSiSr | | -16.54 | | -29.32 to -3.750 | | * | | 0.0113 |
| PG vs. PG@PSi | | -4.657 | | -17.44 to 8.130 | | ns | | 0.7525 |
| PG vs. PG@PSiSr | | -8.517 | | -21.30 to 4.270 | | ns | | 0.2573 |
| PG@PSi vs. PG@PSiSr | | -3.86 | | -16.65 to 8.927 | | ns | | 0.8525 |
| Noted: The “ns” means no significant, *P < 0.05, **P < 0.01, and ***P < 0.001.  **Table S18**: Collagen deposition | | | | | | | | |
| Tukey's multiple comparisons test | Mean Diff. | | 95.00% CI of diff. | | Summary | | P Value | |
| Control vs. P-control | -0.4167 | | -13.53 to 12.70 | | ns | | >0.9999 | |
| Control vs. PG | -3.723 | | -16.84 to 9.389 | | ns | | 0.8771 | |
| Control vs. PG@PSi | -10.58 | | -23.70 to 2.529 | | ns | | 0.1321 | |
| Control vs. PG@PSiSr | -18.23 | | -31.35 to -5.121 | | ** | | 0.007 | |
| P-control vs. PG | -3.307 | | -16.42 to 9.806 | | ns | | 0.9152 | |
| P-control vs. PG@PSi | -10.17 | | -23.28 to 2.946 | | ns | | 0.1543 | |
| P-control vs. PG@PSiSr | -17.82 | | -30.93 to -4.704 | | ** | | 0.0082 | |
| PG vs. PG@PSi | -6.86 | | -19.97 to 6.252 | | ns | | 0.4636 | |
| PG vs. PG@PSiSr | -14.51 | | -27.62 to -1.398 | | * | | 0.029 | |
| PG@PSi vs. PG@PSiSr | -7.65 | | -20.76 to 5.462 | | ns | | 0.3667 | |

Noted: The “ns” means no significant, *P < 0.05, **P < 0.01, and ***P < 0.001.

| **Table S19:** Wound area at day 4 | | | | |
| --- | --- | --- | --- | --- |
| Tukey's multiple comparisons test | Mean Diff. | 95.00% CI of diff. | Summary | P Value |
| Control vs. P-control | 1.127 | -30.03 to 32.29 | ns | >0.9999 |
| Control vs. PG | 6.233 | -24.93 to 37.39 | ns | 0.9611 |
| Control vs. PG@PSi | 26.34 | -4.825 to 57.50 | ns | 0.1095 |
| Control vs. PG@PSiSr | 42.11 | 10.95 to 73.27 | ** | 0.0085 |
| P-control vs. PG | 5.107 | -26.05 to 36.27 | ns | 0.9809 |
| P-control vs. PG@PSi | 25.21 | -5.951 to 56.37 | ns | 0.1309 |
| P-control vs. PG@PSiSr | 40.98 | 9.819 to 72.14 | * | 0.0102 |
| PG vs. PG@PSi | 20.1 | -11.06 to 51.26 | ns | 0.2823 |
| PG vs. PG@PSiSr | 35.87 | 4.712 to 67.03 | * | 0.0231 |
| PG@PSi vs. PG@PSiSr | 15.77 | -15.39 to 46.93 | ns | 0.4933 |

Noted: The “ns” means no significant, *P < 0.05, **P < 0.01, and ***P < 0.001.

| **Table S20:** Wound area at day 7 | | | | |
| --- | --- | --- | --- | --- |
| Tukey's multiple comparisons test | Mean Diff. | 95.00% CI of diff. | Summary | P Value |
| Control vs. P-control | 36.67 | -3.904 to 77.24 | ns | 0.0816 |
| Control vs. PG | 67.51 | 26.94 to 108.1 | ** | 0.0019 |
| Control vs. PG@PSi | 79.82 | 39.25 to 120.4 | *** | 0.0005 |
| Control vs. PG@PSiSr | 82.85 | 42.28 to 123.4 | *** | 0.0004 |
| P-control vs. PG | 30.84 | -9.731 to 71.41 | ns | 0.166 |
| P-control vs. PG@PSi | 43.15 | 2.579 to 83.72 | * | 0.0361 |
| P-control vs. PG@PSiSr | 46.18 | 5.609 to 86.75 | * | 0.0247 |
| PG vs. PG@PSi | 12.31 | -28.26 to 52.88 | ns | 0.8503 |
| PG vs. PG@PSiSr | 15.34 | -25.23 to 55.91 | ns | 0.7279 |
| PG@PSi vs. PG@PSiSr | 3.03 | -37.54 to 43.60 | ns | 0.999 |

Noted: The “ns” means no significant, *P < 0.05, **P < 0.01, and ***P < 0.001.

| **Table S21:** Wound area at day 10 | | | | |
| --- | --- | --- | --- | --- |
| Tukey's multiple comparisons test | Mean Diff. | 95.00% CI of diff. | Summary | P Value |
| Control vs. P-control | 7.647 | -13.41 to 28.70 | ns | 0.7542 |
| Control vs. PG | 22.08 | 1.027 to 43.13 | * | 0.039 |
| Control vs. PG@PSi | 29.81 | 8.754 to 50.86 | ** | 0.0062 |
| Control vs. PG@PSiSr | 48.67 | 27.62 to 69.72 | *** | 0.0001 |
| P-control vs. PG | 14.43 | -6.619 to 35.49 | ns | 0.2355 |
| P-control vs. PG@PSi | 22.16 | 1.107 to 43.21 | * | 0.0382 |
| P-control vs. PG@PSiSr | 41.02 | 19.97 to 62.08 | *** | 0.0006 |
| PG vs. PG@PSi | 7.727 | -13.33 to 28.78 | ns | 0.7475 |
| PG vs. PG@PSiSr | 26.59 | 5.537 to 47.64 | * | 0.0132 |
| PG@PSi vs. PG@PSiSr | 18.86 | -2.189 to 39.92 | ns | 0.0848 |

Noted: The “ns” means no significant, *P < 0.05, **P < 0.01, and ***P < 0.001.

| **Table S22:** Wound area at day 14 | | | | |
| --- | --- | --- | --- | --- |
| Tukey's multiple comparisons test | Mean Diff. | 95.00% CI of diff. | Summary | P Value |
| Control vs. P-control | 19.46 | -8.059 to 46.97 | ns | 0.2133 |
| Control vs. PG | 34.18 | 6.668 to 61.70 | * | 0.0146 |
| Control vs. PG@PSi | 40.42 | 12.90 to 67.94 | ** | 0.0048 |
| Control vs. PG@PSiSr | 52.55 | 25.03 to 80.06 | *** | 0.0007 |
| P-control vs. PG | 14.73 | -12.79 to 42.24 | ns | 0.4432 |
| P-control vs. PG@PSi | 20.96 | -6.552 to 48.48 | ns | 0.1646 |
| P-control vs. PG@PSiSr | 33.09 | 5.575 to 60.61 | * | 0.0178 |
| PG vs. PG@PSi | 6.237 | -21.28 to 33.75 | ns | 0.9403 |
| PG vs. PG@PSiSr | 18.36 | -9.152 to 45.88 | ns | 0.2557 |
| PG@PSi vs. PG@PSiSr | 12.13 | -15.39 to 39.64 | ns | 0.6126 |

Noted: The “ns” means no significant, *P < 0.05, **P < 0.01, and ***P < 0.001.
